# Supplementary material for: The Role of Grandparenting in Enhancing Longevity: Evidence from the China Health and Retirement Longitudinal Study
Source: Research Square preprint supplement (doi:10.21203/rs.3.rs-8002377/v1), 2025-12-11
Supplement: Supplementary file 1 [file 5a2d1b89305611bdf3102f3f.docx]

**Appendix Table S1**

*Mortality Rates by Grandparenting Status, Care Provision, Duration, and Intensity*

| Variable | Category | Alive in the next wave | Died in the next wave |
| --- | --- | --- | --- |
| Grandparenthood | No grandchild | 98.40% | 1.60% |
|  | Having grandchild(ren) | 95.84% | 4.16% |
| Grandchild Care | Not caring for grandchild(ren) | 95.52% | 4.48% |
|  | Caring for grandchild(ren) | 97.46% | 2.54% |
| Care Duration | 0 waves | 93.61% | 6.39% |
|  | 1 wave | 96.15% | 3.85% |
|  | 2 waves | 97.94% | 2.06% |
|  | 3 waves | 98.79% | 1.21% |
|  | 4 waves | 99.49% | 0.51% |
| Care Intensity | 0 hours | 95.52% | 4.48% |
|  | 1-99 hours | 98.40% | 1.60% |
|  | 100-499 hours | 97.42% | 2.58% |
|  | 500+ hours | 97.38% | 2.62% |

**Appendix Table S2**

*Robustness Check of Effects on Mortality (No Entropy Balancing Reweighting)*

|  | Model 1a | Model 2a | Model 3a | Model 4a |
| --- | --- | --- | --- | --- |
| Grandparenthood (ref. No grandchild) | | | |  |
| Having grandchild(ren) | 0.913 |  |  |  |
|  | (0.095) |  |  |  |
| Grandchild Care (ref. Not caring for grandchild(ren) | | | | |
| Caring for grandchild(ren) |  | 0.808*** |  |  |
|  |  | (0.047) |  |  |
| Care Duration (ref. 0 waves) | | |  |  |
| 1 wave |  |  | 0.812*** |  |
|  |  |  | (0.047) |  |
| 2 waves |  |  | 0.461*** |  |
|  |  |  | (0.037) |  |
| 3 waves |  |  | 0.290*** |  |
|  |  |  | (0.031) |  |
| 4 waves |  |  | 0.123*** |  |
|  |  |  | (0.028) |  |
| Care Intensity (ref. 0 hours) | | |  |  |
| 1-99 hours |  |  |  | 0.503** |
|  |  |  |  | (0.108) |
| 100-499 hours |  |  |  | 0.817 |
|  |  |  |  | (0.101) |
| 500+ hours |  |  |  | 0.837** |
|  |  |  |  | (0.052) |
| Survey Year (ref. 2011) | | |  |  |
| 2013 | 1.163* | 1.119 | 1.152† | 1.116 |
|  | (0.090) | (0.090) | (0.093) | (0.090) |
| 2015 | 1.619*** | 1.613*** | 1.738*** | 1.609*** |
|  | (0.118) | (0.122) | (0.129) | (0.122) |
| 2018 | 0.911 | 0.904 | 1.038 | 0.903 |
|  | (0.074) | (0.076) | (0.085) | (0.076) |
| Age | 1.103*** | 1.098*** | 1.080*** | 1.098*** |
|  | (0.004) | (0.004) | (0.004) | (0.004) |
| Gender (ref. Male) | |  |  |  |
| Female | 0.545*** | 0.540*** | 0.534*** | 0.540*** |
|  | (0.028) | (0.028) | (0.028) | (0.028) |
| Education (ref. Illiterate/Primary) | | |  |  |
| Middle school | 0.861** | 0.859* | 0.857** | 0.860* |
|  | (0.050) | (0.051) | (0.051) | (0.051) |
| High school | 0.919 | 0.952 | 0.959 | 0.951 |
|  | (0.068) | (0.073) | (0.074) | (0.073) |
| College or above | 0.691*** | 0.660*** | 0.669*** | 0.657*** |
|  | (0.074) | (0.077) | (0.078) | (0.076) |
| Marital Status (ref. Married/Cohabitating) | | | |  |
| Separated/Divorced | 1.646** | 1.727** | 1.500* | 1.734** |
|  | (0.303) | (0.342) | (0.293) | (0.343) |
| Widowed | 1.332*** | 1.341*** | 1.279*** | 1.342*** |
|  | (0.076) | (0.077) | (0.073) | (0.077) |
| Place of Residence (ref. Rural) | | |  |  |
| Urban | 1.142* | 1.160** | 1.193*** | 1.161** |
|  | (0.059) | (0.062) | (0.064) | (0.062) |
| Pension (ref. No pension) | | |  |  |
| Having pension | 0.970 | 0.966 | 0.971 | 0.966 |
|  | (0.056) | (0.058) | (0.058) | (0.058) |
| Retirement (ref. Not retired) | | |  |  |
| Retired | 1.015 | 0.998 | 1.000 | 0.997 |
|  | (0.073) | (0.074) | (0.075) | (0.074) |
| Number of Child(ren) | 1.009 | 1.008 | 0.999 | 1.008 |
|  | (0.017) | (0.018) | (0.017) | (0.018) |
| Child(ren)’s Education (ref. Illiterate/Primary) | | | |  |
| Middle school | 0.963 | 0.971 | 0.961 | 0.970 |
|  | (0.057) | (0.059) | (0.059) | (0.059) |
| High school | 0.872† | 0.878† | 0.851* | 0.878† |
|  | (0.061) | (0.063) | (0.062) | (0.063) |
| College or above | 0.747*** | 0.746*** | 0.713*** | 0.747*** |
|  | (0.061) | (0.063) | (0.061) | (0.064) |
| Child(ren)’s Income (ref. Under 2,000 yuan) | | | |  |
| 2,000-20,000 yuan | 0.849 | 0.846 | 0.881 | 0.847 |
|  | (0.095) | (0.107) | (0.111) | (0.107) |
| 20,000-100,000 yuan | 0.755** | 0.754* | 0.792† | 0.754* |
|  | (0.082) | (0.093) | (0.097) | (0.093) |
| Above 100,000 yuan | 0.584*** | 0.588*** | 0.607*** | 0.590*** |
|  | (0.081) | (0.088) | (0.090) | (0.088) |
| Financial Transfer (ref. No financial transfer) | | | |  |
| Having financial transfer | 1.002 | 1.031 | 1.055 | 1.030 |
|  | (0.060) | (0.064) | (0.065) | (0.064) |
| Living Distance (ref. Living with children) | | | |  |
| Living close to children | 0.831** | 0.810** | 0.738*** | 0.811** |
|  | (0.053) | (0.052) | (0.048) | (0.052) |
| Living far from children | 0.855** | 0.833*** | 0.763*** | 0.834** |
|  | (0.046) | (0.046) | (0.042) | (0.046) |
| Sample Size | 52940 | 45247 | 45247 | 45247 |

**Appendix Table S3**

*Robustness Check of Effects on Mortality* *(Complete Cases, No KNN Imputation)*

|  | Model 1b | Model 2b | Model 3b | Model 4b |
| --- | --- | --- | --- | --- |
| Grandparenthood (ref. No grandchild) | | | |  |
| Having grandchild(ren) | 0.854 |  |  |  |
|  | (0.124) |  |  |  |
| Grandchild Care (ref. Not caring for grandchild(ren) | | | | |
| Caring for grandchild(ren) |  | 0.804*** |  |  |
|  |  | (0.051) |  |  |
| Care Duration (ref. 0 waves) | | |  |  |
| 1 wave |  |  | 1.033 |  |
|  |  |  | (0.071) |  |
| 2 waves |  |  | 0.512*** |  |
|  |  |  | (0.046) |  |
| 3 waves |  |  | 0.312*** |  |
|  |  |  | (0.036) |  |
| 4 waves |  |  | 0.109*** |  |
|  |  |  | (0.029) |  |
| Care Intensity (ref. 0 hours) | | |  |  |
| 1-99 hours |  |  |  | 0.504** |
|  |  |  |  | (0.117) |
| 100-499 hours |  |  |  | 0.806 |
|  |  |  |  | (0.107) |
| 500+ hours |  |  |  | 0.833** |
|  |  |  |  | (0.056) |
| Survey Year (ref. 2011) | | |  |  |
| 2013 | 1.119 | 1.117 | 1.148 | 1.113 |
|  | (0.108) | (0.111) | (0.114) | (0.111) |
| 2015 | 1.604*** | 1.652*** | 1.771*** | 1.648*** |
|  | (0.146) | (0.156) | (0.163) | (0.155) |
| 2018 | 0.839† | 0.856 | 0.951 | 0.856 |
|  | (0.087) | (0.090) | (0.099) | (0.090) |
| Age | 1.097*** | 1.094*** | 1.080*** | 1.094*** |
|  | (0.005) | (0.005) | (0.005) | (0.005) |
| Gender (ref. Male) | |  |  |  |
| Female | 0.526*** | 0.525*** | 0.522*** | 0.524*** |
|  | (0.033) | (0.034) | (0.033) | (0.033) |
| Education (ref. Illiterate/Primary) | | |  |  |
| Middle school | 0.844* | 0.856* | 0.848* | 0.857* |
|  | (0.060) | (0.062) | (0.061) | (0.062) |
| High school | 0.922 | 0.973 | 0.985 | 0.971 |
|  | (0.082) | (0.088) | (0.089) | (0.088) |
| College or above | 0.638*** | 0.640** | 0.645** | 0.636** |
|  | (0.084) | (0.091) | (0.091) | (0.090) |
| Marital Status (ref. Married/Cohabitating) | | | |  |
| Separated/Divorced | 1.978** | 1.948* | 1.671† | 1.960* |
|  | (0.466) | (0.512) | (0.440) | (0.514) |
| Widowed | 1.389*** | 1.384*** | 1.332*** | 1.389*** |
|  | (0.103) | (0.102) | (0.097) | (0.102) |
| Place of Residence (ref. Rural) | | |  |  |
| Urban | 1.133† | 1.158* | 1.191** | 1.159* |
|  | (0.073) | (0.075) | (0.078) | (0.076) |
| Pension (ref. No pension) | | |  |  |
| Having pension | 0.986 | 0.978 | 0.986 | 0.978 |
|  | (0.072) | (0.073) | (0.073) | (0.073) |
| Retirement (ref. Not retired) | | |  |  |
| Retired | 1.027 | 0.965 | 0.981 | 0.965 |
|  | (0.097) | (0.091) | (0.092) | (0.091) |
| Number of Child(ren) | 1.031 | 1.033 | 1.019 | 1.032 |
|  | (0.023) | (0.023) | (0.023) | (0.023) |
| Child(ren)’s Education (ref. Illiterate/Primary) | | | |  |
| Middle school | 0.962 | 0.982 | 0.988 | 0.981 |
|  | (0.071) | (0.073) | (0.074) | (0.073) |
| High school | 0.865 | 0.896 | 0.892 | 0.896 |
|  | (0.076) | (0.080) | (0.080) | (0.080) |
| College or above | 0.749** | 0.798* | 0.778* | 0.800* |
|  | (0.078) | (0.084) | (0.083) | (0.085) |
| Child(ren)’s Income (ref. Under 2,000 yuan) | | | |  |
| 2,000-20,000 yuan | 0.913 | 0.871 | 0.889 | 0.876 |
|  | (0.136) | (0.142) | (0.144) | (0.143) |
| 20,000-100,000 yuan | 0.823 | 0.774 | 0.782 | 0.776 |
|  | (0.120) | (0.123) | (0.124) | (0.124) |
| Above 100,000 yuan | 0.603** | 0.563** | 0.541*** | 0.567** |
|  | (0.105) | (0.104) | (0.100) | (0.105) |
| Financial Transfer (ref. No financial transfer) | | | |  |
| Having financial transfer | 1.088 | 1.080 | 1.065 | 1.077 |
|  | (0.086) | (0.088) | (0.086) | (0.088) |
| Living Distance (ref. Living with children) | | | |  |
| Living close to children | 0.930 | 0.903 | 0.831* | 0.904 |
|  | (0.073) | (0.071) | (0.066) | (0.071) |
| Living far from children | 0.868* | 0.874* | 0.831** | 0.875† |
|  | (0.058) | (0.060) | (0.057) | (0.060) |
| Sample Size | 44427 | 38710 | 38710 | 38710 |

**Appendix Table S4**

*Robustness Check of Effects on Mortality (2011–2018 Data Only)*

|  | Model 1c | Model 2c | Model 3c | Model 4c |
| --- | --- | --- | --- | --- |
| Grandparenthood (ref. No grandchild) | | | |  |
| Having grandchild(ren) | 0.855 |  |  |  |
|  | (0.117) |  |  |  |
| Grandchild Care (ref. Not caring for grandchild(ren) | | | | |
| Caring for grandchild(ren) |  | 0.863* |  |  |
|  |  | (0.059) |  |  |
| Care Duration (ref. 0 waves) | | |  |  |
| 1 wave |  |  | 1.114 |  |
|  |  |  | (0.081) |  |
| 2 waves |  |  | 0.484*** |  |
|  |  |  | (0.048) |  |
| 3 waves |  |  | 0.310*** |  |
|  |  |  | (0.046) |  |
| Care Intensity (ref. 0 hours) | | |  |  |
| 1-99 hours |  |  |  | 0.565* |
|  |  |  |  | (0.139) |
| 100-499 hours |  |  |  | 0.850 |
|  |  |  |  | (0.122) |
| 500+ hours |  |  |  | 0.893 |
|  |  |  |  | (0.065) |
| Survey Year (ref. 2011) | | |  |  |
| 2013 | 1.075 | 1.058 | 1.056 | 1.052 |
|  | (0.101) | (0.104) | (0.103) | (0.103) |
| 2015 | 1.407*** | 1.423*** | 1.445*** | 1.416*** |
|  | (0.127) | (0.133) | (0.133) | (0.132) |
| Age | 1.097*** | 1.095*** | 1.086*** | 1.095*** |
|  | (0.005) | (0.005) | (0.005) | (0.005) |
| Gender (ref. Male) | |  |  |  |
| Female | 0.561*** | 0.551*** | 0.546*** | 0.550*** |
|  | (0.038) | (0.038) | (0.038) | (0.038) |
| Education (ref. Illiterate/Primary) | | |  |  |
| Middle school | 0.947 | 0.948 | 0.945 | 0.949 |
|  | (0.073) | (0.075) | (0.074) | (0.075) |
| High school | 1.132 | 1.164 | 1.152 | 1.162 |
|  | (0.109) | (0.116) | (0.115) | (0.116) |
| College or above | 0.712* | 0.697* | 0.694* | 0.693* |
|  | (0.102) | (0.110) | (0.110) | (0.110) |
| Marital Status (ref. Married/Cohabitating) | | | |  |
| Separated/Divorced | 1.762* | 1.780† | 1.605 | 1.786† |
|  | (0.479) | (0.543) | (0.493) | (0.544) |
| Widowed | 1.205* | 1.232* | 1.183* | 1.235** |
|  | (0.097) | (0.100) | (0.096) | (0.101) |
| Place of Residence (ref. Rural) | | |  |  |
| Urban | 1.108 | 1.132† | 1.151* | 1.132† |
|  | (0.077) | (0.081) | (0.082) | (0.081) |
| Pension (ref. No pension) | | |  |  |
| Having pension | 1.023 | 0.992 | 1.010 | 0.992 |
|  | (0.078) | (0.078) | (0.080) | (0.079) |
| Retirement (ref. Not retired) | | |  |  |
| Retired | 1.031 | 0.965 | 0.987 | 0.964 |
|  | (0.102) | (0.100) | (0.102) | (0.100) |
| Number of Child(ren) | 1.036 | 1.039 | 1.028 | 1.038 |
|  | (0.024) | (0.025) | (0.024) | (0.025) |
| Child(ren)’s Education (ref. Illiterate/Primary) | | | |  |
| Middle school | 1.013 | 1.043 | 1.036 | 1.041 |
|  | (0.080) | (0.084) | (0.083) | (0.084) |
| High school | 0.903 | 0.935 | 0.938 | 0.936 |
|  | (0.087) | (0.093) | (0.093) | (0.093) |
| College or above | 0.768* | 0.805† | 0.781* | 0.808† |
|  | (0.087) | (0.094) | (0.091) | (0.095) |
| Child(ren)’s Income (ref. Under 2,000 yuan) | | | |  |
| 2,000-20,000 yuan | 1.002 | 0.936 | 0.944 | 0.941 |
|  | (0.171) | (0.183) | (0.184) | (0.184) |
| 20,000-100,000 yuan | 0.861 | 0.801 | 0.803 | 0.804 |
|  | (0.144) | (0.153) | (0.153) | (0.154) |
| Above 100,000 yuan | 0.672† | 0.602* | 0.580* | 0.605* |
|  | (0.141) | (0.136) | (0.131) | (0.137) |
| Financial Transfer (ref. No financial transfer) | | | |  |
| Having financial transfer | 1.125 | 1.119 | 1.122 | 1.116 |
|  | (0.094) | (0.097) | (0.097) | (0.097) |
| Living Distance (ref. Living with children) | | | |  |
| Living close to children | 0.981 | 0.955 | 0.884 | 0.957 |
|  | (0.079) | (0.078) | (0.073) | (0.078) |
| Living far from children | 0.866† | 0.869† | 0.836* | 0.871† |
|  | (0.064) | (0.066) | (0.063) | (0.066) |
| Sample Size | 40533 | 33801 | 33801 | 33801 |

**Appendix Table S5**

*Robustness Check of Moderation Analyses on Mortality (No Entropy Balancing Reweighting)*

|  | Model 5a | Model 6a | Model 7a | Model 8a |
| --- | --- | --- | --- | --- |
| Grandchild Care (ref. Not caring for grandchild(ren) | | | | |
| Caring for grandchild(ren) | 0.860* | 0.846** | 0.861* | 0.709*** |
|  | (0.060) | (0.053) | (0.059) | (0.061) |
| Survey Year (ref. 2011) | | |  |  |
| 2013 | 1.119 | 1.118 | 1.119 | 1.095 |
|  | (0.090) | (0.090) | (0.090) | (0.089) |
| 2015 | 1.613*** | 1.613*** | 1.612*** | 1.564*** |
|  | (0.122) | (0.122) | (0.122) | (0.119) |
| 2018 | 0.904 | 0.901 | 0.904 | 0.876 |
|  | (0.076) | (0.075) | (0.076) | (0.074) |
| Age | 1.098*** | 1.098*** | 1.098*** | 1.097*** |
|  | (0.004) | (0.004) | (0.004) | (0.004) |
| Gender (ref. Male) | |  |  |  |
| Female | 0.563*** | 0.540*** | 0.539*** | 0.643*** |
|  | (0.033) | (0.028) | (0.028) | (0.045) |
| Education (ref. Illiterate/Primary) | | |  |  |
| Middle school | 0.860* | 0.862* | 0.859* | 0.858** |
|  | (0.051) | (0.051) | (0.051) | (0.051) |
| High school | 0.950 | 0.953 | 0.953 | 0.953 |
|  | (0.072) | (0.073) | (0.073) | (0.073) |
| College or above | 0.657*** | 0.660*** | 0.661*** | 0.650*** |
|  | (0.076) | (0.077) | (0.077) | (0.076) |
| Marital Status (ref. Married/Cohabitating) | | | |  |
| Separated/Divorced | 1.741** | 1.469† | 1.726** | 1.746** |
|  | (0.344) | (0.334) | (0.342) | (0.354) |
| Widowed | 1.339*** | 1.411*** | 1.341*** | 1.342*** |
|  | (0.077) | (0.088) | (0.077) | (0.078) |
| Place of Residence (ref. Rural) | | |  |  |
| Urban | 1.159** | 1.159** | 1.216** | 1.149** |
|  | (0.062) | (0.062) | (0.073) | (0.061) |
| Pension (ref. No pension) | | |  |  |
| Having pension | 0.966 | 0.967 | 0.966 | 0.957 |
|  | (0.058) | (0.058) | (0.058) | (0.057) |
| Retirement (ref. Not retired) | | |  |  |
| Retired | 1.001 | 1.000 | 0.994 | 0.987 |
|  | (0.074) | (0.074) | (0.074) | (0.074) |
| Number of Child(ren) | 1.008 | 1.009 | 1.008 | 1.005 |
|  | (0.018) | (0.018) | (0.018) | (0.018) |
| Child(ren)’s Education (ref. Illiterate/Primary) | | | |  |
| Middle school | 0.970 | 0.968 | 0.972 | 0.968 |
|  | (0.059) | (0.059) | (0.059) | (0.059) |
| High school | 0.877† | 0.872† | 0.879† | 0.867* |
|  | (0.063) | (0.063) | (0.063) | (0.063) |
| College or above | 0.745*** | 0.744*** | 0.749*** | 0.742*** |
|  | (0.063) | (0.063) | (0.064) | (0.063) |
| Child(ren)’s Income (ref. Under 2,000 yuan) | | | |  |
| 2,000-20,000 yuan | 0.846 | 0.845 | 0.846 | 0.842 |
|  | (0.107) | (0.107) | (0.107) | (0.107) |
| 20,000-100,000 yuan | 0.755* | 0.753* | 0.754* | 0.755* |
|  | (0.093) | (0.093) | (0.093) | (0.093) |
| Above 100,000 yuan | 0.590*** | 0.588*** | 0.589*** | 0.585*** |
|  | (0.088) | (0.088) | (0.088) | (0.087) |
| Financial Transfer (ref. No financial transfer) | | | |  |
| Having financial transfer | 1.032 | 1.034 | 1.031 | 1.022 |
|  | (0.064) | (0.064) | (0.064) | (0.064) |
| Living Distance (ref. Living with children) | | | |  |
| Living close to children | 0.810** | 0.809** | 0.810** | 0.801*** |
|  | (0.052) | (0.052) | (0.052) | (0.052) |
| Living far from children | 0.834*** | 0.834** | 0.832*** | 0.831*** |
|  | (0.046) | (0.046) | (0.046) | (0.046) |
| Smoking Behaviors (ref. Never smoked) | | | |  |
| Former smoker |  |  |  | 1.514*** |
|  |  |  |  | (0.120) |
| Current smoker |  |  |  | 1.025 |
|  |  |  |  | (0.080) |
| Interaction Terms | |  |  |  |
| Caring for grandchild(ren)×Female | 0.846 |  |  |  |
|  | (0.094) |  |  |  |
| Caring for grandchild(ren)×Separated/Divorced |  | 2.375† |  |  |
|  |  | (1.051) |  |  |
| Caring for grandchild(ren)×Widowed |  | 0.724* |  |  |
|  |  | (0.108) |  |  |
| Caring for grandchild(ren)×Urban |  |  | 0.830 |  |
|  |  |  | (0.094) |  |
| Caring for grandchild(ren)×Former smoker |  |  |  | 1.334* |
|  |  |  |  | (0.177) |
| Caring for grandchild(ren)×Current smoker |  |  |  | 1.219 |
|  |  |  |  | (0.155) |
| Sample Size | 45247 | 45247 | 45247 | 45247 |

**Appendix Table S6**

*Robustness Check of Moderation Analyses on Mortality (Complete Cases, No KNN Imputation)*

|  | Model 5b | Model 6b | Model 7b | Model 8b |
| --- | --- | --- | --- | --- |
| Grandchild Care (ref. Not caring for grandchild(ren) | | | | |
| Caring for grandchild(ren) | 0.881 | 0.871* | 0.881† | 0.666*** |
|  | (0.068) | (0.060) | (0.066) | (0.065) |
| Survey Year (ref. 2011) | | |  |  |
| 2013 | 1.117 | 1.116 | 1.117 | 1.124 |
|  | (0.111) | (0.111) | (0.111) | (0.124) |
| 2015 | 1.653*** | 1.655*** | 1.652*** | 1.643*** |
|  | (0.155) | (0.156) | (0.156) | (0.161) |
| 2018 | 0.857 | 0.857 | 0.855 | 0.872 |
|  | (0.090) | (0.091) | (0.090) | (0.095) |
| Age | 1.094*** | 1.094*** | 1.094*** | 1.092*** |
|  | (0.005) | (0.005) | (0.005) | (0.005) |
| Gender (ref. Male) | |  |  |  |
| Female | 0.583*** | 0.526*** | 0.524*** | 0.631*** |
|  | (0.042) | (0.034) | (0.033) | (0.057) |
| Education (ref. Illiterate/Primary) | | |  |  |
| Middle school | 0.857* | 0.861* | 0.856* | 0.839* |
|  | (0.062) | (0.063) | (0.062) | (0.066) |
| High school | 0.971 | 0.972 | 0.974 | 0.947 |
|  | (0.088) | (0.088) | (0.088) | (0.092) |
| College or above | 0.636** | 0.639** | 0.642** | 0.656** |
|  | (0.090) | (0.090) | (0.091) | (0.100) |
| Marital Status (ref. Married/Cohabitating) | | | |  |
| Separated/Divorced | 1.981** | 1.272 | 1.943* | 2.069** |
|  | (0.521) | (0.378) | (0.510) | (0.560) |
| Widowed | 1.389*** | 1.673*** | 1.386*** | 1.458*** |
|  | (0.102) | (0.130) | (0.102) | (0.115) |
| Place of Residence (ref. Rural) | | |  |  |
| Urban | 1.157* | 1.159* | 1.300*** | 1.164* |
|  | (0.075) | (0.076) | (0.096) | (0.080) |
| Pension (ref. No pension) | | |  |  |
| Having pension | 0.979 | 0.981 | 0.980 | 1.000 |
|  | (0.073) | (0.073) | (0.073) | (0.079) |
| Retirement (ref. Not retired) | | |  |  |
| Retired | 0.968 | 0.967 | 0.960 | 0.891 |
|  | (0.091) | (0.091) | (0.091) | (0.091) |
| Number of Child(ren) | 1.033 | 1.034 | 1.032 | 1.023 |
|  | (0.023) | (0.023) | (0.023) | (0.025) |
| Child(ren)’s Education (ref. Illiterate/Primary) | | | |  |
| Middle school | 0.981 | 0.976 | 0.982 | 0.950 |
|  | (0.073) | (0.073) | (0.073) | (0.075) |
| High school | 0.894 | 0.888 | 0.899 | 0.878 |
|  | (0.080) | (0.080) | (0.081) | (0.083) |
| College or above | 0.796* | 0.793* | 0.804* | 0.794* |
|  | (0.084) | (0.084) | (0.085) | (0.089) |
| Child(ren)’s Income (ref. Under 2,000 yuan) | | | |  |
| 2,000-20,000 yuan | 0.870 | 0.862 | 0.872 | 0.852 |
|  | (0.142) | (0.140) | (0.142) | (0.146) |
| 20,000-100,000 yuan | 0.774 | 0.767† | 0.776 | 0.764 |
|  | (0.123) | (0.122) | (0.123) | (0.128) |
| Above 100,000 yuan | 0.564** | 0.558** | 0.565** | 0.561** |
|  | (0.104) | (0.103) | (0.105) | (0.109) |
| Financial Transfer (ref. No financial transfer) | | | |  |
| Having financial transfer | 1.081 | 1.085 | 1.077 | 1.061 |
|  | (0.088) | (0.089) | (0.088) | (0.091) |
| Living Distance (ref. Living with children) | | | |  |
| Living close to children | 0.904 | 0.903 | 0.904 | 0.888 |
|  | (0.071) | (0.071) | (0.071) | (0.074) |
| Living far from children | 0.874* | 0.876† | 0.873* | 0.833* |
|  | (0.060) | (0.060) | (0.060) | (0.060) |
| Smoking Behaviors (ref. Never smoked) | | | |  |
| Former smoker |  |  |  | 1.413** |
|  |  |  |  | (0.149) |
| Current smoker |  |  |  | 0.990 |
|  |  |  |  | (0.099) |
| Interaction Terms | |  |  |  |
| Caring for grandchild(ren)×Female | 0.780* |  |  |  |
|  | (0.098) |  |  |  |
| Caring for grandchild(ren)×Separated/Divorced |  | 2.644† |  |  |
|  |  | (1.348) |  |  |
| Caring for grandchild(ren)×Widowed |  | 0.583** |  |  |
|  |  | (0.098) |  |  |
| Caring for grandchild(ren)×Urban |  |  | 0.765* |  |
|  |  |  | (0.097) |  |
| Caring for grandchild(ren)×Former smoker |  |  |  | 1.486* |
|  |  |  |  | (0.237) |
| Caring for grandchild(ren)×Current smoker |  |  |  | 1.195 |
|  |  |  |  | (0.180) |
| Sample Size | 38710 | 38710 | 38710 | 35785 |

**Appendix Table S7**

*Robustness Check of Moderation Analyses on Mortality (2011-2018 Data Only)*

|  | Model 5c | Model 6c | Model 7c | Model 8c |
| --- | --- | --- | --- | --- |
| Grandchild Care (ref. Not caring for grandchild(ren) | | | | |
| Caring for grandchild(ren) | 0.947 | 0.901 | 0.928 | 0.777* |
|  | (0.079) | (0.067) | (0.076) | (0.079) |
| Survey Year (ref. 2011) | | |  |  |
| 2013 | 1.058 | 1.059 | 1.058 | 1.031 |
|  | (0.104) | (0.104) | (0.104) | (0.101) |
| 2015 | 1.424*** | 1.427*** | 1.422*** | 1.368*** |
|  | (0.133) | (0.134) | (0.133) | (0.128) |
| Age | 1.094*** | 1.095*** | 1.095*** | 1.094*** |
|  | (0.005) | (0.006) | (0.005) | (0.006) |
| Gender (ref. Male) | |  |  |  |
| Female | 0.616*** | 0.550*** | 0.551*** | 0.722*** |
|  | (0.048) | (0.038) | (0.038) | (0.066) |
| Education (ref. Illiterate/Primary) | | |  |  |
| Middle school | 0.949 | 0.949 | 0.949 | 0.944 |
|  | (0.075) | (0.075) | (0.075) | (0.075) |
| High school | 1.162 | 1.164 | 1.165 | 1.161 |
|  | (0.116) | (0.116) | (0.116) | (0.116) |
| College or above | 0.692* | 0.697* | 0.700* | 0.693* |
|  | (0.110) | (0.111) | (0.111) | (0.110) |
| Marital Status (ref. Married/Cohabitating) | | | |  |
| Separated/Divorced | 1.818* | 1.040 | 1.778† | 1.751† |
|  | (0.554) | (0.362) | (0.542) | (0.535) |
| Widowed | 1.235** | 1.407*** | 1.231* | 1.236** |
|  | (0.101) | (0.119) | (0.100) | (0.101) |
| Place of Residence (ref. Rural) | | |  |  |
| Urban | 1.130† | 1.132† | 1.246** | 1.126† |
|  | (0.081) | (0.081) | (0.101) | (0.081) |
| Pension (ref. No pension) | | |  |  |
| Having pension | 0.993 | 0.994 | 0.993 | 0.989 |
|  | (0.079) | (0.079) | (0.078) | (0.078) |
| Retirement (ref. Not retired) | | |  |  |
| Retired | 0.969 | 0.967 | 0.961 | 0.954 |
|  | (0.101) | (0.100) | (0.100) | (0.100) |
| Number of Child(ren) | 1.039 | 1.039 | 1.037 | 1.035 |
|  | (0.025) | (0.025) | (0.025) | (0.025) |
| Child(ren)’s Education (ref. Illiterate/Primary) | | | |  |
| Middle school | 1.041 | 1.035 | 1.042 | 1.037 |
|  | (0.084) | (0.084) | (0.084) | (0.084) |
| High school | 0.933 | 0.925 | 0.936 | 0.926 |
|  | (0.093) | (0.092) | (0.093) | (0.092) |
| College or above | 0.803† | 0.797† | 0.809† | 0.806† |
|  | (0.094) | (0.094) | (0.095) | (0.095) |
| Child(ren)’s Income (ref. Under 2,000 yuan) | | | |  |
| 2,000-20,000 yuan | 0.935 | 0.924 | 0.937 | 0.931 |
|  | (0.182) | (0.180) | (0.183) | (0.182) |
| 20,000-100,000 yuan | 0.800 | 0.790 | 0.802 | 0.795 |
|  | (0.153) | (0.151) | (0.153) | (0.152) |
| Above 100,000 yuan | 0.602* | 0.595* | 0.604* | 0.595* |
|  | (0.137) | (0.135) | (0.137) | (0.135) |
| Financial Transfer (ref. No financial transfer) | | | |  |
| Having financial transfer | 1.119 | 1.125 | 1.117 | 1.109 |
|  | (0.097) | (0.098) | (0.097) | (0.096) |
| Living Distance (ref. Living with children) | | | |  |
| Living close to children | 0.956 | 0.952 | 0.955 | 0.943 |
|  | (0.078) | (0.078) | (0.078) | (0.077) |
| Living far from children | 0.869† | 0.871† | 0.869† | 0.867† |
|  | (0.066) | (0.066) | (0.066) | (0.066) |
| Smoking Behaviors (ref. Never smoked) | | | |  |
| Former smoker |  |  |  | 1.644*** |
|  |  |  |  | (0.173) |
| Current smoker |  |  |  | 1.173 |
|  |  |  |  | (0.118) |
| Interaction Terms | |  |  |  |
| Caring for grandchild(ren)×Female | 0.778† |  |  |  |
|  | (0.105) |  |  |  |
| Caring for grandchild(ren)×Separated/Divorced |  | 3.468* |  |  |
|  |  | (1.960) |  |  |
| Caring for grandchild(ren)×Widowed |  | 0.697* |  |  |
|  |  | (0.128) |  |  |
| Caring for grandchild(ren)×Urban |  |  | 0.809 |  |
|  |  |  | (0.110) |  |
| Caring for grandchild(ren)×Former smoker |  |  |  | 1.323† |
|  |  |  |  | (0.210) |
| Caring for grandchild(ren)×Current smoker |  |  |  | 1.136 |
|  |  |  |  | (0.172) |
| Sample Size | 33801 | 33801 | 33801 | 33801 |

**Appendix Table S8**

*Robustness Check of Pathways Analyses on Mortality (No Entropy Balancing Reweighting)*

| Variables | Effect | Coef. | Std. Err. | z | P> |z| |
| --- | --- | --- | --- | --- | --- |
| Life Satisfaction | Total effect | -0.215 | 0.058 | -3.73 | 0.000 |
|  | Direct effect | -0.212 | 0.058 | -3.68 | 0.000 |
|  | Indirect effect | -0.003 | 0.002 | -1.68 | 0.093 |
| Depression | Total effect | -0.208 | 0.058 | -3.61 | 0.000 |
|  | Direct effect | -0.209 | 0.058 | -3.63 | 0.000 |
|  | Indirect effect | 0.001 | 0.003 | 0.40 | 0.686 |
| Cognitive Function | Total effect | -0.208 | 0.058 | -3.60 | 0.000 |
|  | Direct effect | -0.193 | 0.058 | -3.34 | 0.001 |
|  | Indirect effect | -0.015 | 0.003 | -5.32 | 0.000 |
| Functional Limitations | Total effect | -0.183 | 0.058 | -3.14 | 0.002 |
|  | Direct effect | -0.166 | 0.058 | -2.85 | 0.004 |
|  | Indirect effect | -0.017 | 0.004 | -4.20 | 0.000 |
| Social Participation | Total effect | -0.215 | 0.058 | -3.73 | 0.000 |
|  | Direct effect | -0.196 | 0.058 | -3.39 | 0.001 |
|  | Indirect effect | -0.019 | 0.004 | -5.24 | 0.000 |

**Appendix Table S9**

*Robustness Check of Pathways Analyses on Mortality (Complete Cases, No KNN Imputation)*

| Variables | Effect | Coef. | Std. Err. | z | P> |z| |
| --- | --- | --- | --- | --- | --- |
| Life Satisfaction | Total effect | -0.177 | 0.071 | -2.50 | 0.013 |
|  | Direct effect | -0.176 | 0.071 | -2.48 | 0.013 |
|  | Indirect effect | -0.001 | 0.001 | -0.74 | 0.461 |
| Depression | Total effect | -0.169 | 0.070 | -2.42 | 0.016 |
|  | Direct effect | -0.171 | 0.070 | -2.44 | 0.015 |
|  | Indirect effect | 0.002 | 0.002 | 0.90 | 0.367 |
| Cognitive Function | Total effect | -0.139 | 0.082 | -1.70 | 0.088 |
|  | Direct effect | -0.133 | 0.082 | -1.63 | 0.104 |
|  | Indirect effect | -0.006 | 0.003 | -2.16 | 0.031 |
| Functional Limitations | Total effect | -0.182 | 0.064 | -2.85 | 0.004 |
|  | Direct effect | -0.166 | 0.064 | -2.61 | 0.009 |
|  | Indirect effect | -0.015 | 0.004 | -3.44 | 0.001 |
| Social Participation | Total effect | -0.219 | 0.063 | -3.49 | 0.000 |
|  | Direct effect | -0.202 | 0.063 | -3.21 | 0.001 |
|  | Indirect effect | -0.017 | 0.004 | -4.33 | 0.000 |

**Appendix Table S10**

*Robustness Check of Pathways Analyses on Mortality (2011-2018 Data Only)*

| Variables | Effect | Coef. | Std. Err. | z | P> |z| |
| --- | --- | --- | --- | --- | --- |
| Life Satisfaction | Total effect | -0.152 | 0.068 | -2.22 | 0.026 |
|  | Direct effect | -0.148 | 0.068 | -2.17 | 0.030 |
|  | Indirect effect | -0.004 | 0.002 | -1.99 | 0.046 |
| Depression | Total effect | -0.145 | 0.068 | -2.13 | 0.034 |
|  | Direct effect | -0.146 | 0.068 | -2.15 | 0.032 |
|  | Indirect effect | 0.002 | 0.003 | 0.62 | 0.535 |
| Cognitive Function | Total effect | -0.142 | 0.068 | -2.08 | 0.038 |
|  | Direct effect | -0.131 | 0.068 | -1.92 | 0.055 |
|  | Indirect effect | -0.011 | 0.003 | -3.59 | 0.000 |
| Functional Limitations | Total effect | -0.115 | 0.069 | -1.66 | 0.096 |
|  | Direct effect | -0.101 | 0.069 | -1.45 | 0.146 |
|  | Indirect effect | -0.014 | 0.005 | -3.12 | 0.002 |
| Social Participation | Total effect | -0.148 | 0.068 | -2.17 | 0.030 |
|  | Direct effect | -0.136 | 0.068 | -1.99 | 0.046 |
|  | Indirect effect | -0.012 | 0.003 | -3.40 | 0.001 |
